# Supplementary material for: Effect of enhanced p CO 2 levels on the production of dissolved organic carbon and transparent exopolymer particles in short-term bioassay experiments
Source: Copernicus journal article supplement (doi:10.5194/bg-11-3695-2014), 2014-07-10
Supplement: Supplementary file 1 [file Suppfig1 caption.pdf › Suppfig1 caption.pdf]

Supplementary figure 1: Evolution of total bacterial abundance (cells m<sup>-1</sup>) and primary production (mmol C m<sup>-3</sup> d<sup>-1</sup>) in five bioassay experiments across three time points for all pCO<sub>2</sub> treatments. Legend shows the colours and symbols used to denote the different pCO<sub>2</sub> treatments. Bacterial abundance was measured using flow cytometry (Zubkov et al., 2001). Primary production was measured using <sup>14</sup>C-labelled sodium bicarbonate (see Richier et al., 2014 for more details).

Zubkov, M.V.; Sleigh, M.A.; Burkill, P.H.. 2001 Heterotrophic bacterial turnover along the 20°W meridian between 59°N and 37°N in July 1996. *Deep-Sea Research II*, 48 (4-5). 987-1001.
