# Supplementary material for: Effect of enhanced p CO 2 levels on the production of dissolved organic carbon and transparent exopolymer particles in short-term bioassay experiments
Source: Copernicus journal article supplement (doi:10.5194/bg-11-3695-2014), 2014-07-10
Supplement: Supplementary file 2 [file supplement-cover-letter.pdf › supplement-cover-letter.pdf]

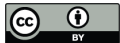

*Supplement of*

## **Effect of enhanced $p\text{CO}_2$ levels on the production of dissolved organic carbon and transparent exopolymer particles in short-term bioassay experiments**

**G. A. MacGilchrist et al.**

*Correspondence to:* E. P. Achterberg ([eric@noc.soton.ac.uk](mailto:eric@noc.soton.ac.uk))

- Supplement-Cover-Letter.pdf
- Suppfig1 caption.pdf
- suppfig\_bactpp.svg.png
